# Supplementary material for: Prominent bacterial heterotrophy and sources of 13 C-depleted fatty acids to the interior Canada Basin
Source: Copernicus journal article supplement (doi:10.5194/bg-10-7065-2013), 2013-11-07
Supplement: Supplementary file 1 [file bg-10-7065-2013-supplement.pdf]

1 **Prominent bacterial heterotrophy and sources of <sup>13</sup>C-depleted**  
2 **fatty acids to the interior Canada Basin**

3

4 **S. R. Shah<sup>1</sup>, D. R. Griffith<sup>2</sup>, V. Galy<sup>3</sup>, A. P. McNichol<sup>1</sup> and T. I., Eglinton<sup>4</sup>**

5 [1]{Geology and Geophysics Department, Woods Hole Oceanographic Institution, 266 Woods Hole  
6 Road, Woods Hole MA 02543}

7 [2]{MIT/WHOI Joint Program in Oceanography}

8 [3]{Marine Chemistry and Geochemistry Department, Woods Hole Oceanographic Institution, 266  
9 Woods Hole Road, Woods Hole MA 02543}

10 [4]{Swiss Federal Institute of Technology, Zurich}

# 1 Supplementary material

2 Supplementary Table 1.  $\delta^{13}\text{C}$  values of POC and FAMES in the Canada Basin prior to sorption blank corrections

|                                 | DOC blank        |                  | seasonally ice-free station CB4 |                  |                  |                  |                  |                  |                  |                  | ice-covered station CB9 |                  |                  |                 |
|---------------------------------|------------------|------------------|---------------------------------|------------------|------------------|------------------|------------------|------------------|------------------|------------------|-------------------------|------------------|------------------|-----------------|
|                                 | (‰) ±            | (‰) ±            | 50 m<br>(‰) ±                   | 150 m<br>(‰) ±   | 1000 m<br>(‰) ±  | 2000 m<br>(‰) ±  | 2500 m<br>(‰) ±  | 3000 m<br>(‰) ±  | 3500 m<br>(‰) ±  | 3750 m<br>(‰) ±  | 50 m<br>(‰) ±           | 150 m<br>(‰) ±   | 500 m<br>(‰) ±   | 1000 m<br>(‰) ± |
| <b>POC</b>                      | <b>-25.1 0.1</b> | <b>-29.5 0.1</b> | <b>-24.8 0.1</b>                | <b>-22.7 0.1</b> | <b>-23.0 0.1</b> | <b>-22.7 0.1</b> | <b>-24.5 0.1</b> | <b>-24.3 0.1</b> | <b>-24.6 0.1</b> | <b>-27.0 0.1</b> | n.d.                    | <b>-24.1 0.1</b> | n.d.             |                 |
| 12:0                            | -27.9 1.0        |                  | -29.5 0.3                       | -27.5 0.4        |                  |                  | -32.1 2.6        | -30.3 0.9        | -30.0 0.6        |                  |                         |                  |                  |                 |
| 14:0                            | -30.0 0.3        | -36.2 0.7        | -30.1 0.5                       | -24.1 0.5        | -25.2 0.6        | -27.2 0.3        | -26.4 0.3        | -26.4 0.4        | -26.9 0.3        | -34.5 0.4        | -27.9 0.3               | -27.1 0.4        | -25.8 1.3        |                 |
| 15:0                            |                  | -34.0 0.7        | -25.7 0.3                       | -22.7 1.1        | -22.4 1.1        | -24.8 0.6        | -26.2 0.6        | -25.7 0.3        | -28.3 0.5        | -30.8 0.4        |                         | -25.4 0.4        | -22.3 0.9        |                 |
| 16:0                            | -26.5 0.4        | -35.8 0.3        | -29.5 0.3                       | -26.1 0.5        | -27.7 0.4        | -27.7 0.4        | -25.1 0.3        | -25.5 0.3        | -26.2 0.4        | -35.1 0.3        | -28.8 0.6               | -27.8 0.4        | -27.1 0.4        |                 |
| 17:0                            |                  |                  | -28.5 0.5                       | -23.3 1.0        | -23.7 1.0        |                  | -23.1 0.6        | -23.0 0.8        | -23.8 0.6        |                  |                         | -25.2 0.7        |                  |                 |
| 18:0                            | -25.9 0.3        | -30.0 0.5        | -28.6 0.3                       | -28.1 0.3        | -27.5 0.3        | -27.4 0.3        | -24.7 0.6        | -24.5 0.3        | -26.8 0.3        | -29.6 0.7        | -28.9 0.3               | -28.1 0.3        | -28.6 0.3        |                 |
| <b>SFA</b>                      | <b>-26.4 2.3</b> | <b>-35.4 3.1</b> | <b>-29.7 2.6</b>                | <b>-27.1 2.3</b> | <b>-27.7 2.4</b> | <b>-27.8 2.4</b> | <b>-23.9 2.0</b> | <b>-24.8 2.2</b> | <b>-27.3 2.3</b> | <b>-34.2 3.0</b> | <b>-29.1 2.5</b>        | <b>-27.9 2.4</b> | <b>-27.9 2.4</b> |                 |
| i-15:0                          |                  | -31.2 0.5        | -24.6 0.5                       | -21.8 0.5        | -21.7 0.8        | -23.1 0.7        | -24.4 0.9        | -25.1 0.5        | -22.7 0.5        | -26.3 0.4        |                         | -23.9 0.3        | -22.6 1.5        |                 |
| ai-15:0                         |                  | -28.4 0.3        | -24.1 0.3                       | -22.7 0.3        | -22.7 0.5        | -22.6 1.3        | -23.8 0.6        | -24.6 0.3        | -22.7 0.6        | -24.7 0.3        |                         | -22.9 0.3        | -22.0 0.3        |                 |
| i-17:0                          |                  |                  |                                 | -21.0 0.9        |                  |                  | -41.8 2.8        | -39.8 0.3        | -22.1 0.9        |                  |                         | -23.0 0.3        |                  |                 |
| <b>BFA</b>                      |                  | <b>-30.0 2.6</b> | <b>-24.4 2.0</b>                | <b>-22.1 1.8</b> | <b>-22.3 1.6</b> | <b>-22.8 1.3</b> | <b>-27.4 1.6</b> | <b>-27.3 2.3</b> | <b>-22.6 1.6</b> | <b>-25.8 2.2</b> |                         | <b>-23.4 2.0</b> | <b>-22.3 1.4</b> |                 |
| 16:1n9                          |                  |                  |                                 |                  |                  |                  |                  |                  |                  | -28.6 0.3        |                         |                  |                  |                 |
| 18:1n9                          |                  |                  |                                 |                  |                  |                  |                  |                  |                  | -32.7 0.4        |                         |                  |                  |                 |
| <b>MUFA</b>                     |                  |                  |                                 |                  |                  |                  |                  |                  |                  | <b>-29.9 2.7</b> |                         |                  |                  |                 |
| 18:2n6                          |                  |                  |                                 |                  |                  |                  |                  |                  |                  | -26.5 0.9        |                         |                  |                  |                 |
| $\Delta\text{POC} - \text{SFA}$ | <b>1.3</b>       | <b>5.8</b>       | <b>4.9</b>                      | <b>4.3</b>       | <b>4.7</b>       | <b>5.1</b>       | <b>-0.6</b>      | <b>0.5</b>       | <b>2.7</b>       | <b>7.2</b>       |                         | <b>3.8</b>       |                  |                 |
| $\Delta\text{POC} - \text{BFA}$ |                  | <b>0.5</b>       | <b>-0.4</b>                     | <b>-0.6</b>      | <b>-0.7</b>      | <b>0.1</b>       | <b>2.9</b>       | <b>3.0</b>       | <b>-2.0</b>      | <b>-1.2</b>      |                         | <b>-0.7</b>      |                  |                 |
| $\Delta\text{SFA} - \text{BFA}$ |                  | <b>-5.3</b>      | <b>-5.3</b>                     | <b>-4.9</b>      | <b>-5.4</b>      | <b>-5.0</b>      | <b>3.5</b>       | <b>2.5</b>       | <b>-4.7</b>      | <b>-8.4</b>      |                         | <b>-4.5</b>      | <b>-5.6</b>      |                 |

3 n.d. not determined

4
